1 **Regulatory phosphorylation site tunes Phosphoglucomutase 1**  
2 **as a metabolic valve to control mobilization of glycogen stores.**

3 Sofia Doello <sup>1</sup>, Niels Neumann <sup>1</sup>, Philipp Spät <sup>2</sup>, Boris Maček <sup>2</sup> and Karl Forchhammer <sup>1\*</sup>

4 <sup>1</sup>Interfaculty Institute of Microbiology and Infection Medicine, University of Tübingen, Auf der Morgenstelle 28,  
5 72076 Tübingen, Germany

6 <sup>2</sup>Department of Quantitative Proteomics, University of Tübingen, Auf der Morgenstelle 15, 72076 Tübingen,  
7 Germany

8 \*Corresponding author: [karl.forchhammer@uni-tuebingen.de](mailto:karl.forchhammer@uni-tuebingen.de)

9 **Classification:** Biological Sciences; Microbiology

10 **Key words:** glycogen metabolism, phosphoglucomutase, glucose-6-phosphate  
11 dehydrogenase, phosphorylation, metabolic channeling, carbon flux, oxidative pentose  
12 phosphate cycle protein, cyanobacteria

13

## 14 **Abstract**

15 Regulation of glycogen metabolism is of vital importance in organisms of all three  
16 kingdoms of life. Although the pathways involved in glycogen synthesis and degradation are  
17 well known, many regulatory aspects around the metabolism of this polysaccharide remain  
18 undeciphered. Here, we used the unicellular cyanobacterium *Synechocystis* as a model to  
19 investigate how glycogen metabolism is regulated in dormant nitrogen-starved cells, which  
20 entirely rely on glycogen catabolism to restore growth. We found that the activity of the  
21 enzymes involved in glycogen synthesis and degradation is tightly controlled at different  
22 levels via post-translational modifications. Phosphorylation of phosphoglucomutase 1 (Pgm1)  
23 on a peripheral residue (Ser63) regulates Pgm1 activity and controls the mobilization of the  
24 glycogen stores. Inhibition of Pgm1 activity via phosphorylation on Ser63 appears essential  
25 for survival of *Synechocystis* in the dormant state. Remarkably, this regulatory mechanism  
26 seems to be conserved from bacteria to humans. Moreover, phosphorylation of Pgm1  
27 influences the formation of a metabolon, which includes Pgm1, oxidative pentose phosphate  
28 cycle protein (OpcA) and glucose-6-phosphate dehydrogenase (G6PDH). Analysis of the  
29 steady-state levels of the metabolic products of glycogen degradation together with protein-  
30 protein interaction studies revealed that the activity of G6PDH and the formation of this  
31 metabolon are under additional redox control, likely to ensure metabolic channeling of  
32 glucose-6-phosphate to the required pathways for each developmental stage.

## 33 **Significance statement**

34 In this study, we showed that post-translational modification of phosphoglucomutase 1  
35 (Pgm1) via phosphorylation at a peripheral residue is a key, evolutionary-conserved  
36 regulatory mechanism that controls the utilization of the glycogen reserves. We identified  
37 Pgm1 as a central metabolic valve, associating with oxidative pentose phosphate cycle protein  
38 (OpcA) and glucose-6-phosphate dehydrogenase (G6PDH) into a metabolon. This interaction  
39 is regulated by the phosphorylation state of Pgm1 and the redox state of OpcA, and probably  
40 allows direction of the carbon flux into the required metabolic pathways.

41

## 42 Introduction

43 Glycogen is the major carbohydrate storage compound in a broad range of organisms, from  
44 bacteria to humans. This polysaccharide is composed of glucose molecules connected by  $\alpha$ ,1-  
45 4 linkages and branched via  $\alpha$ ,1-6 linkages, and it is generally considered a carbon sink with  
46 energy-storage function. In humans, glycogen is mainly accumulated in the liver and skeletal  
47 muscle, and it constitutes a rapid and accessible form of energy that can be supplied to tissues  
48 on demand.<sup>1</sup> In many bacteria, glycogen plays a crucial role in survival to an ever-changing  
49 environment. It is usually synthesized and accumulated inside the cells under growth-limiting  
50 conditions at excess of a carbon source, and degraded when the supply of energy or carbon is  
51 not enough to maintain growth or viability, thus allowing cell survival in transient starvation  
52 conditions.<sup>2</sup> In cyanobacteria, which generally sustain cell growth by performing oxygenic  
53 photosynthesis, glycogen is synthesized towards the end of the day, when photosynthetically  
54 fixed carbon is in excess and cells need to prepare to survive the night.<sup>3</sup> Glycogen  
55 accumulation also occurs as a response to nutrient limitation. In fact, the greatest amount of  
56 glycogen accumulation in non-diazotrophic cyanobacteria, which are unable to fix  
57 atmospheric N<sub>2</sub>, occurs under nitrogen starvation conditions.<sup>4</sup>

58 Nitrogen deprivation activates a genetically determined survival program in non-  
59 diazotrophic cyanobacteria, which has been extensively studied in the unicellular  
60 cyanobacterial strains *Synechococcus elongatus* and *Synechocystis* sp. PCC 6803 (from now  
61 *Synechocystis*).<sup>5</sup> When *Synechocystis* encounters nitrogen depletion, the intracellular  
62 carbon/nitrogen balance is disturbed, and growth can no longer be supported. This metabolic  
63 situation leads to rapid accumulation of glycogen, which serves as a sink for the excess of  
64 carbon.<sup>5</sup> In order to survive these starvation conditions, cells undergo an adaptation process  
65 termed chlorosis that involves the degradation of the light-harvesting complexes to avoid an  
66 excess of energy and reduction equivalents that are no longer consumed by anabolic reactions.  
67 As a result of the metabolic and morphological changes induced by nitrogen starvation, cells  
68 enter a dormant state, which allows them to survive adverse conditions for a prolonged period  
69 of time.<sup>6</sup> Upon nitrogen availability, the glycogen stores accumulated in dormant cells play a  
70 key role in the restoration of vegetative growth.<sup>7</sup> When dormant cells have access to a  
71 nitrogen source, their metabolism switches towards a heterotrophic mode. They turn off  
72 residual photosynthesis, while the production of energy and metabolic intermediates now  
73 entirely relies on glycogen catabolism.<sup>8</sup> This extraordinary situation, in which carbohydrate  
74 degradation can be completely separated from photosynthetic processes even in the presence

75 of light, makes awakening *Synechocystis* cells an excellent model to study the regulation of  
76 glycogen catabolism.

77 Although the metabolic pathways involved in glycogen synthesis and degradation are well  
78 known, many regulatory aspects around the metabolism of this polysaccharide remain to be  
79 deciphered. In nitrogen-starved *Synechocystis* cells, glycogen degradation is known to start  
80 soon after addition of a nitrogen source, and the enzymes responsible for this process have  
81 been identified (**Figure 1**).<sup>7</sup> However, how glycogen catabolism is induced in dormant cells  
82 has not yet been elucidated. The enzymes involved in glycogen metabolism are conserved  
83 from bacteria to humans. The glycogen phosphorylase and debranching enzyme are  
84 responsible for the excision of glucose molecules from the glycogen granule, releasing  
85 glucose-1-phosphate (glucose-1P) and glucose, respectively. Glucose-1P is then converted to  
86 glucose-6-phosphate (glucose-6P) by the phosphoglucomutase (Pgm), an evolutionary  
87 conserved enzyme that also catalyzes the reverse reaction, while glucose is converted to  
88 glucose-6P by the glucokinase (Glk). Glucose-6P is then metabolized by the glucose-6-  
89 phosphate dehydrogenase (G6PDH) and enters either the Entner-Doudoroff (ED) or the  
90 oxidative pentose phosphate (OPP) pathway. Even though *Synechocystis* also possess the  
91 enzymes to catabolize glucose-6P via the Embden-Meyerhof-Parnas (EMP) pathway, this  
92 route has been shown not to be relevant for resuscitation from nitrogen starvation.  
93 Intriguingly, most of the main glycogen catabolic enzymes are up-regulated during nitrogen  
94 starvation, although glycogen degradation does not start until a nitrogen source is available.  
95 This suggests that the activity of these enzymes must be tightly regulated: They must remain  
96 inactive when cells are dormant and be activated upon nitrogen availability. An exception to  
97 the abundance pattern of most glycogen catabolic enzymes is Pgm1, whose expression is  
98 suppressed under nitrogen starvation and activated during resuscitation.<sup>8,9</sup> Although  
99 *Synechocystis* possesses two Pgm isoenzymes, Pgm1 (*sll0726*) has been shown to be  
100 responsible for almost 97 % of the Pgm activity.<sup>10</sup> Pgm1 was recently identified as a  
101 phosphoprotein with two localized serine phosphorylation sites: Ser 63 and Ser 68. Ser 168,  
102 which is predicted to be in the catalytic center, shows diminished phosphorylation during  
103 chlorosis. On the contrary, the phosphorylation of Ser 63 strongly increases during nitrogen  
104 starvation, representing one of the most strongly induced phosphorylation events.<sup>9</sup> These  
105 findings prompted us to investigate the possible involvement of Pgm1 in the regulation of  
106 glycogen metabolism in resuscitating cells, enabling us to unravel some of the key regulatory  
107 mechanisms in glycogen catabolism, which seem to be conserved from bacteria to humans.

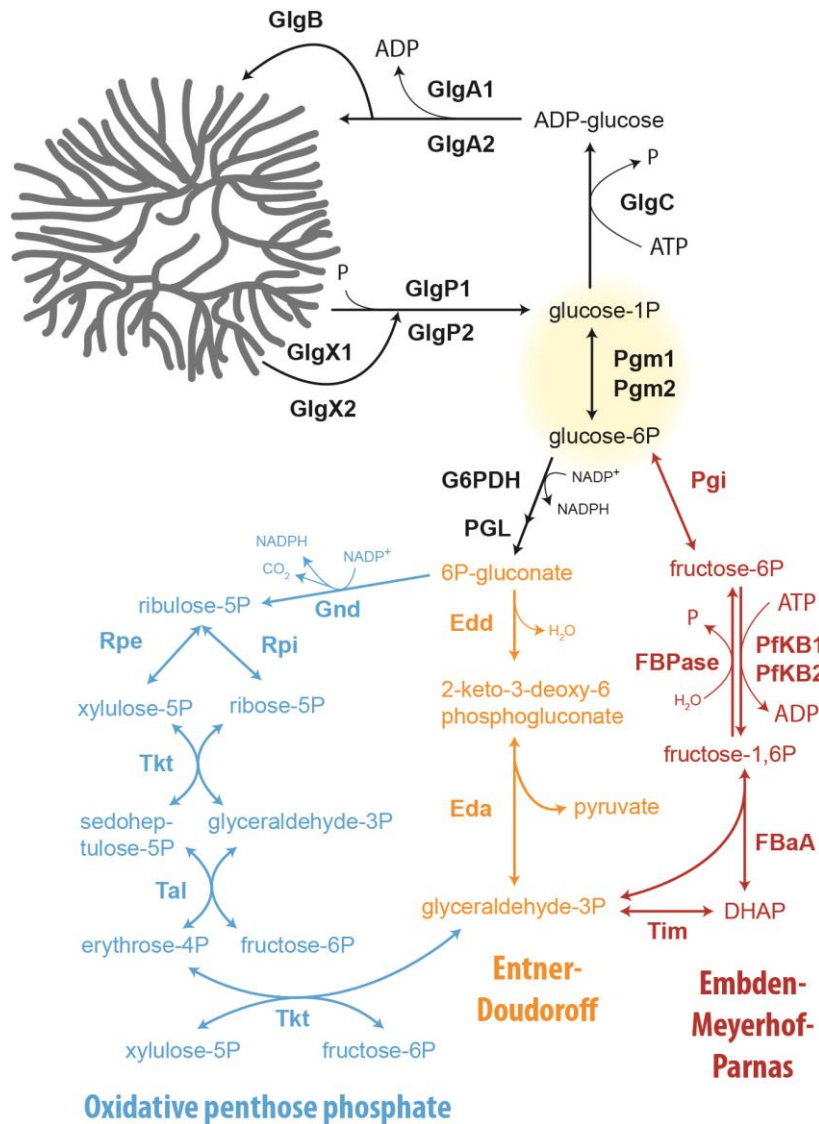

108

109 **Figure 1. Schematic representation of the pathways involved in glycogen metabolism in *Synechocystis*.**

## 110 **Results**

### 111 **Pgm1 is activated during resuscitation from nitrogen starvation.**

112 The transcription of the glycogen catabolic genes in *Synechocystis* is highly up-regulated  
 113 during nitrogen deprivation,<sup>11</sup> when glycogen is synthesized, and turned down during  
 114 resuscitation.<sup>7</sup> In a proteomic study covering the same developmental stages, Spät et al.<sup>9</sup>  
 115 revealed that the glycogen catabolic enzymes are up-regulated in dormant and resuscitating  
 116 cells (**Figure 2A**). One exception to this expression pattern is the Pgm1, the abundance of  
 117 which is low during nitrogen starvation and increases during resuscitation (**Figure 2A**). In the  
 118 same study, a quantitative analysis of the phosphorylation events during nitrogen starvation  
 119 and resuscitation revealed that Pgm1 can be phosphorylated at two different residues: Ser 63

120 and Ser 168.<sup>9</sup> Interestingly, Ser 63 is one of the most phosphorylated residues in chlorotic  
121 cells, being 15 times more phosphorylated under nitrogen starvation than during vegetative  
122 growth (**Figure 2B**). These findings suggested that Pgm1 might be a regulatory point in  
123 glycogen catabolism. To test if there was any change in the activity of Pgm1 upon addition of  
124 a nitrogen source to dormant cells, we assayed Pgm1 activity in cell extracts from chlorotic  
125 and resuscitating cells (**Figure 2C**). While Pgm1 activity was detectable in cells under  
126 nitrogen starvation, the measured activity was 3 times higher in cells that had been  
127 supplemented with nitrate 24 hours before. These results suggested an activation of Pgm1  
128 upon addition of nitrogen to chlorotic cells.

129 Given the high phosphorylation of the residue Ser 63 in nitrogen-starved cells, we  
130 speculated that Ser 63 might be a regulatory phosphorylation site. To determine whether  
131 phosphorylation of Pgm1 affects its activity, we treated cell extracts from chlorotic and  
132 resuscitating cells with alkaline phosphatase (AP) and measured Pgm1 activity before and  
133 after treatment. As shown in **Figure 2D**, a higher Pgm1 activity was measured after 10 min of  
134 treatment with AP in cells extracts from chlorotic, as well as from resuscitating cells.  
135 According to homology modeling of Pgm1, Ser 168 is the catalytic seryl-residue involved in  
136 the phosphor-exchange reaction and it is located in the active site of Pgm1 (**Figure 2E**). This  
137 catalytic serine is poorly phosphorylated during nitrogen starvation and it progressively  
138 becomes more phosphorylated during resuscitation (**Figure 2B**). Since phosphorylation of the  
139 catalytic serine is required for catalysis, the phosphorylation dynamics of this residue  
140 corresponds to its state of catalytic activity, with Pgm1 being inactive in chlorotic cells and  
141 becoming activated during resuscitation. Ser 63 follows the opposite pattern: The high level  
142 of phosphorylation of this residue under nitrogen starvation progressively decreases during  
143 resuscitation (**Figure 2B**). As deduced from homology modeling, Ser 63 is located on the  
144 surface of the enzyme, close to the access to the catalytic site (**Figure 2E**). Since Ser 168 is  
145 buried in the catalytic center, AP is more likely to dephosphorylate the surface-located Ser 63.  
146 Thus, the obtained results suggested that dephosphorylation of Ser 63 induces Pgm1 activity.

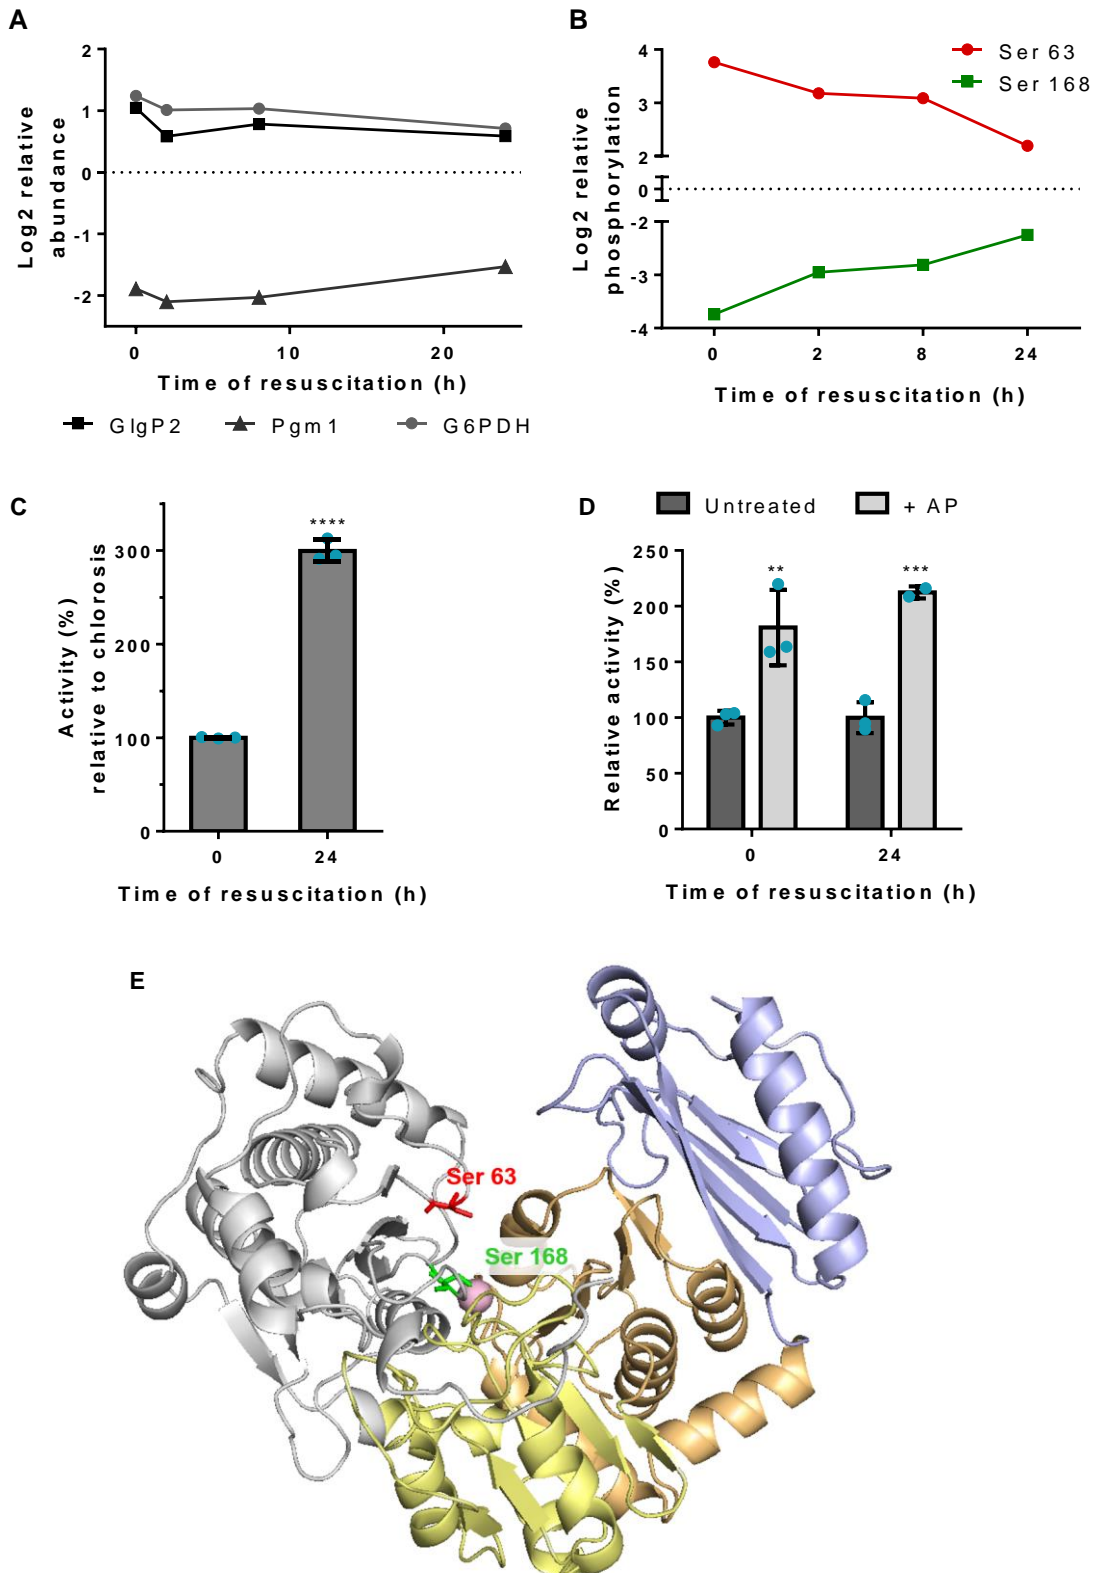

147

148 **Figure 2. Abundance, phosphorylation and activity of Pgm1 during nitrogen starvation and resuscitation.**  
 149 (A) Protein abundance ratios of GlgP2, G6PDH and Pgm1 during resuscitation from nitrogen starvation. Ratios  
 150 were calculated comparing the protein abundance during nitrogen starvation and resuscitation with their  
 151 abundance during vegetative growth. Relative abundance is shown as the Log2 of the calculated ratios. Positive  
 152 values indicate up-regulation and negative values down-regulation compared to protein levels during vegetative  
 153 growth (normalized to zero, dotted line).<sup>9</sup> (B) Phosphorylation events of the two phosphorylation sites in Pgm1

154 at the indicated time points during resuscitation from nitrogen starvation. Ratios were calculated comparing the  
155 abundance of phosphorylated and unphosphorylated peptides at different time points during resuscitation to their  
156 abundance during vegetative growth. Relative phosphorylation is shown as the Log<sub>2</sub> of the calculated ratios. <sup>9</sup>  
157 (C) Relative enzyme activity of Pgm1 in cell extracts from chlorotic and resuscitating cells. The activity in  
158 chlorotic cells was considered to be 100%. At least 3 biological replicates were measured. (D) Relative enzyme  
159 activity of Pgm1 in cell extracts from chlorotic and resuscitating cells before and after treatment with an alkaline  
160 phosphatase (AP) for 10 min. The activity before treatment was considered to be 100%. At least 3 biological  
161 replicates were measured. Error bars represent the SD, asterisks represent the statistical significance. (E)  
162 Structure of *Synechocystis*' Pgm1 obtained from Swiss Model using *Salmonella typhimurium*'s Pgm as a  
163 template. The two colored residues shown in a stick model represent the two phosphorylation sites: Ser 63 in red  
164 and Ser 168 in green. The catalytic site is marked as a blue-shaded area and the Mg<sup>+</sup> ion required for catalysis is  
165 shown as a pink sphere.

### 166 **Pgm1 activity is regulated via phosphorylation at Ser 63.**

167 To gain more insights on the effect of phosphorylation of Ser 63 in enzyme activity, we  
168 created different Pgm1 variants with site-specific amino acid substitutions and measured their  
169 activity *in vitro* (**Figure 3A**). First, Ser 63 was replaced by Asp (Pgm1 S63D) to create a  
170 phosphomimetic variant: in comparison to Ser, Asp is a larger, negatively charged amino acid  
171 that resembles a permanently phosphorylated Ser. The purified Pgm1 S63D seemed to be  
172 correctly folded, as deduced from its size exclusion chromatography elution profile (**Figure**  
173 **S1**). However, it presented very low activity *in vitro* (0.32 % of the WT activity), confirming  
174 that phosphorylation of Ser 63 inactivates Pgm1. In an attempt to create a Pgm1 variant that  
175 would mimic a permanently dephosphorylated enzyme, Ser 63 was substituted for Ala, Gly  
176 and Thr (Pgm1 S63A, S63G, and S63T, respectively). All of these variants showed a strongly  
177 reduced activity as compared to the wild-type (WT) Pgm1, with Pgm1 S63A presenting the  
178 highest activity of all variants (15 % of the WT Pgm1 activity). Comparison of the kinetic  
179 parameters of WT Pgm1 and Pgm1 S63A showed that the substitution of Ser for Ala at  
180 position 63 strongly affected the maximal velocity ( $V_{max}$ ) of the reaction, which decreased  
181 almost 10-fold, but it did not decrease substrate affinity, as shown by the apparent Michaelis-  
182 Menten constant ( $K_m$ ) (**Figure 3B**). In fact, the calculated  $K_m$  was even lower for Pgm1 S63A  
183 than for WT Pgm1. These results indicate that replacement of the residue S63 has a direct  
184 impact on the mechanism of catalysis rather than hindering substrate binding to the catalytic  
185 site.



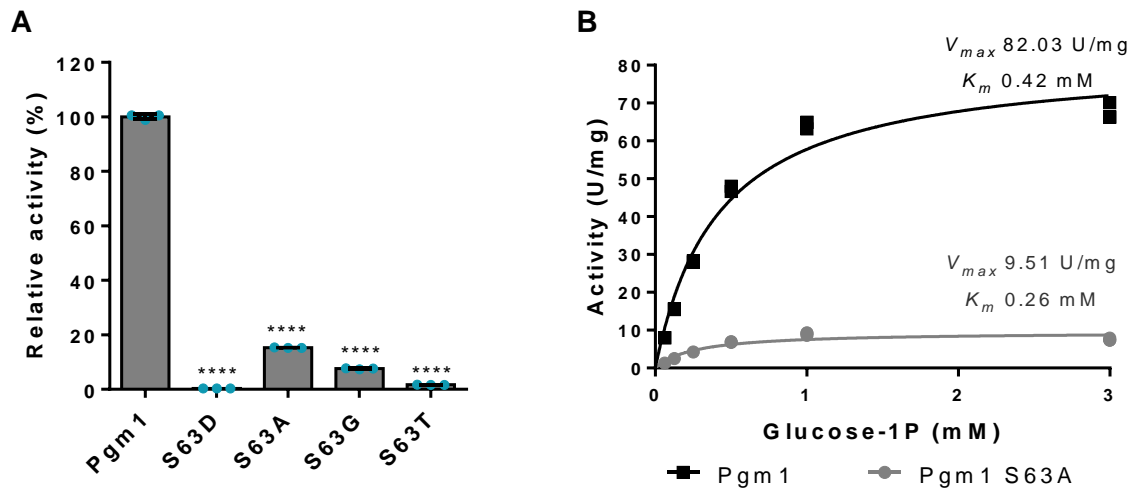

186

187 **Figure 3. Phosphorylation of Ser 63 regulates Pgm1 activity.** (A) Relative *in vitro* activity of wild type (WT)  
188 Pgm1 and different mutant variants. The activity of WT Pgm1 was considered to be 100%. At least 3 replicates  
189 were measured. Error bars represent the SD, asterisks represent the statistical significance. (B) Michaelis-Menten  
190 kinetics of WT Pgm1 (black squares) and Pgm1 S63A (grey circles). Three replicates were measured for each  
191 data-point.

### 192 Phosphorylation of Pgm1 at Ser 63 is essential for survival under nitrogen starvation.

193 So far, we could show that phosphorylation of Ser 63 regulates Pgm1 activity *in vitro*. In  
194 order to determine what role this regulatory phosphorylation plays during nitrogen starvation  
195 in *Synechocystis*, we created and characterized various Pgm1 mutant strains. A Pgm1  
196 knockout strain ( $\Delta pgm1$ ) could not properly acclimate to nitrogen-depletion and presented a  
197 so-called non-bleaching phenotype: Cells did not degrade their photosynthetic pigments and  
198 turned yellow, but stayed greenish instead, progressively looking paler (**Figure 4A**). After  
199 two weeks of nitrogen starvation, a very reduced proportion of cells could recover when they  
200 were dropped on an agar plate containing nitrate, as compared to the WT (**Figure 4B**). Such a  
201 phenotype was previously observed in mutants that were impaired in glycogen synthesis,<sup>12</sup>  
202 since accumulation of this polymer has been shown to be indispensable for adaptation to  
203 nitrogen-starvation. This phenotype was expected, given that Pgm1 catalyzes the  
204 interconversion between glucose-1P and glucose-6P and is therefore involved in glycogen  
205 synthesis. Indeed, no glycogen was detected in seven-days-starved  $\Delta pgm1$  cells (**Figure 4C**),  
206 indicating that Pgm1 activity is essential for glycogen synthesis under nitrogen deprivation,  
207 and that the activity of Pgm2 does not compensate the lack of Pgm1. Consequently, a strain  
208 with an inactive Pgm1 variant, such as the Pgm1 S63D, would not be able to enter the  
209 chlorotic state due to its inability to synthesize glycogen. To study the physiological  
210 consequences of the lack of Pgm1 inactivation via phosphorylation, we complemented the

211 *Δpgm1* strain with the WT Pgm1 (*Δpgm1*+Pgm1) and with the partially active Pgm1 S63A  
212 variant (*Δpgm1*+Pgm1S63A), which lacks the phosphorylation site. Complementation with  
213 the WT protein rescued the phenotype: The *Δpgm1*+Pgm1 strain showed a similar behavior  
214 than the WT under nitrogen starvation (**Figure S2A and B**). However, the  
215 *Δpgm1*+Pgm1S63A strain was unable to acclimate to nitrogen deprivation (**Figure S2A and**  
216 **C**), indicating that the low activity of the Pgm1 S63A variant was not enough meet the  
217 cellular demand for Pgm activity. Therefore, we transformed wild-type cells with Pgm1 S63A  
218 (WT+Pgm1S63A) to study the impact of the lack of phosphorylation of residue 63 on long-  
219 term nitrogen starvation. As expected, this strain could initially acclimate to nitrogen  
220 depletion like the WT, since it contains the WT version of Pgm1. However, after prolonged  
221 exposure to these conditions, in which the WT version of Pgm1 would be highly  
222 phosphorylated, the cultures of the WT+Pgm1S63A strain progressively lost their  
223 characteristic yellowish color (**Figure 4A**). After one month of starvation, only a reduced  
224 number of cells could recover on a nitrate-containing agar plate (**Figure 4D**).  
225 WT+Pgm1S63A cells could synthesize glycogen upon nitrogen depletion, but after one week  
226 of starvation the glycogen content began to gradually decrease (**Figure 4E**). These findings  
227 imply that inactivation of Pgm1 via phosphorylation is crucial for preventing glycogen  
228 degradation during prolonged nitrogen starvation, which appears to be essential for survival of  
229 these conditions.

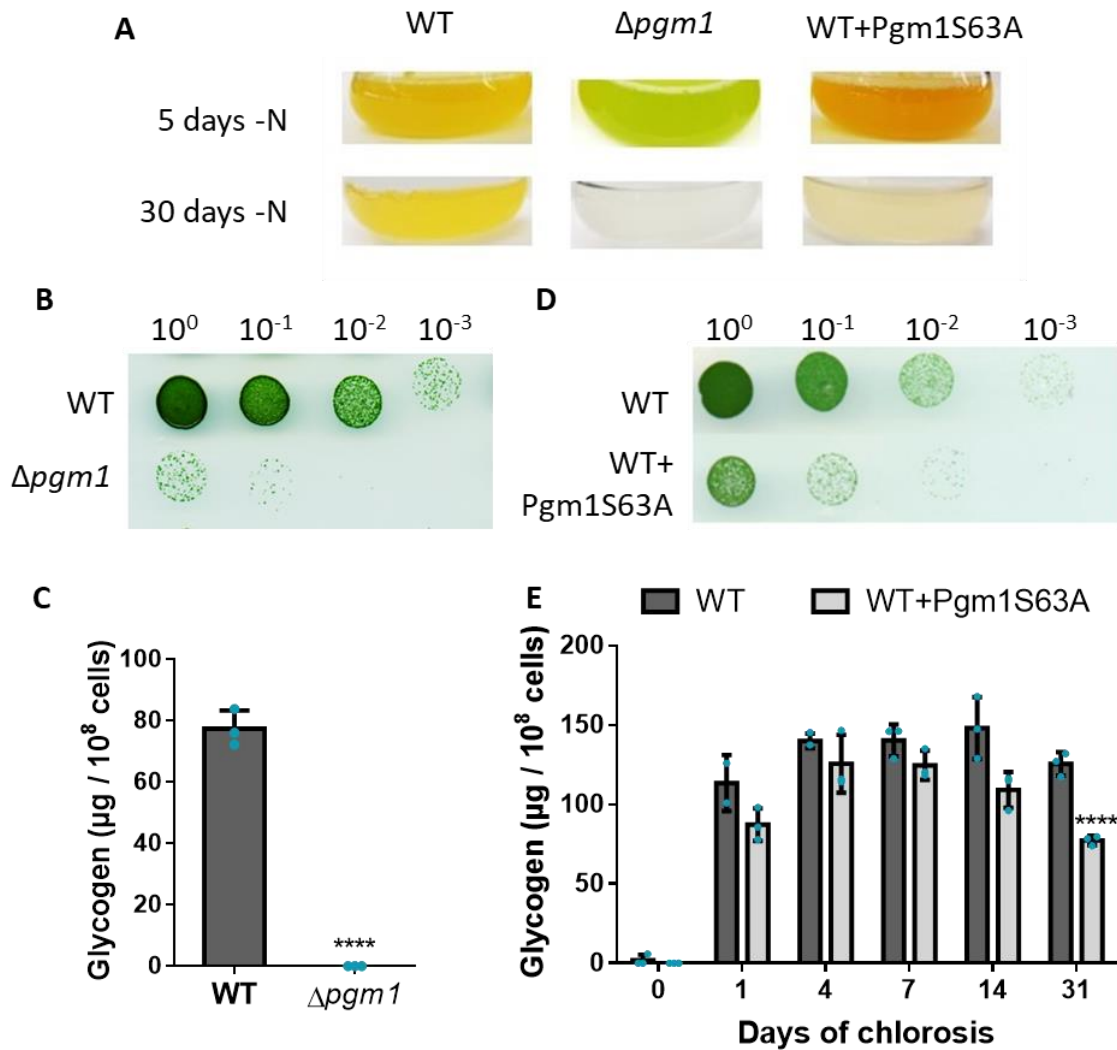

230

231 **Figure 4. Pgm1 is required for glycogen synthesis and glycogen degradation during nitrogen starvation is**  
 232 **prevented by phosphorylation of Ser 63.** (A) Pictures of WT,  $\Delta pgm1$ , and WT+Pgm1S63A cultures after 5 and  
 233 30 days of nitrogen starvation. (B) Recovery assay on a BG<sub>11</sub>-agar plate of WT and  $\Delta pgm1$ . Numbers on top  
 234 represent the dilution factor, starting with an OD<sub>750</sub> of 1. Pictures were taken 5 days after dropping chlorotic cells  
 235 on the plate. (C) Glycogen content of WT and  $\Delta pgm1$  after 7 days of nitrogen starvation. (D) Recovery assay of  
 236 WT and WT+Pgm1S63A. (E) Glycogen content of WT and WT+Pgm1S63A at the indicated time points during  
 237 nitrogen starvation. In all experiments, three biological replicates were measured. Error bars represent the SD;  
 238 asterisks represent the statistical significance.

### 239 **G6PDH activity is regulated by the redox state of its activator protein, OpcA.**

240 To further prove the inactivation of Pgm1 under long-term nitrogen starvation in  
 241 *Synechocystis*, the levels of glucose-phosphates in chlorotic and resuscitating cells were  
 242 determined. Given the tight regulation of Pgm1, high levels of glucose-1P were expected in  
 243 chlorotic cells, which should decrease upon nitrogen repletion. Indeed, an accumulation of  
 244 glucose-1P during nitrogen starvation was detected: The levels of glucose-1P in chlorotic  
 245 cells were approximately three times higher than in cells that were 21 h into resuscitation  
 246 (**Figure 5**), confirming the inactivity of Pgm1 under nitrogen depletion. Intriguingly, glucose-

247 6P was also found to be accumulated in chlorotic cells (**Figure 5**). In fact, the levels of  
248 glucose-6P in both, chlorotic and resuscitating cells, were 100-fold higher than the levels of  
249 glucose-1P. This entails that the enzyme that metabolizes glucose-6P must also remain  
250 inactive under nitrogen-starvation. During recovery from chlorosis, glucose-6P has been  
251 shown to be metabolized mainly via the ED and OPP pathways,<sup>8</sup> implying that the enzyme  
252 responsible for glucose-6P catabolism is G6PDH.

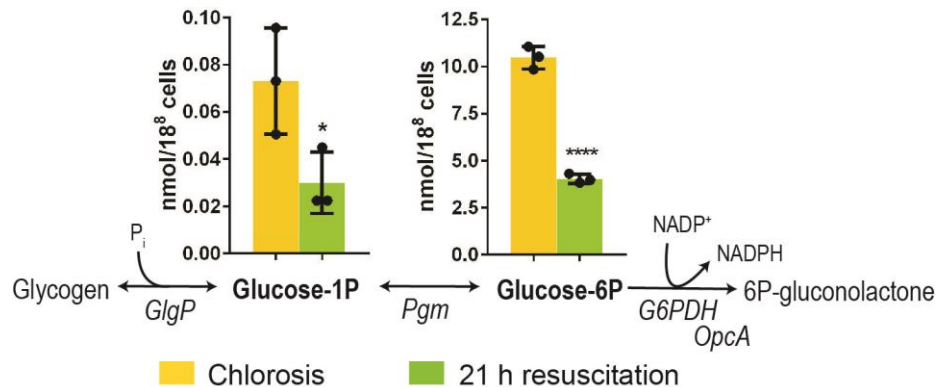

253

254 **Figure 5. Glucose-phosphates accumulate in the cytoplasm during nitrogen starvation.** Glucose-1P and  
255 glucose-6P content normalized to 10<sup>8</sup> cells during nitrogen starvation (yellow) and resuscitation (green). Three  
256 biological replicates were measured. Error bars represent the SD, asterisks represent the statistical significance.

257 We were then set to elucidate how G6PDH is regulated during nitrogen starvation in  
258 *Synechocystis*. In *Anabaena* sp. PCC 7120 and *Nostoc punctiforme*, the activity of G6PDH is  
259 known to be modulated by the redox state of the OPP cycle protein (OpcA), a protein that  
260 serves as an activator of G6PDH. OpcA is conserved in all cyanobacteria and it is required for  
261 G6PDH activity in *Anabaena* 7120, *N. punctiforme* and *Synechococcus* sp. 7942. In  
262 *Anabaena* 7120 and *N. punctiforme*, activation of G6PDH is modulated by the action of  
263 thioredoxin (Trx) on OpcA, which can only serve as an G6PDH activator in its oxidized  
264 state.<sup>13,14</sup> In the above-mentioned organisms, the *opcA* gene is located directly downstream  
265 from *zwf* (the gene encoding for G6PDH), while in *Synechocystis* these two genes are found  
266 in different operons. Moreover, the regulation of G6PDH might be different in *Synechocystis*  
267 than in nitrogen-fixing cyanobacteria, were this enzyme plays an important role in providing  
268 reduction power to the nitrogenase. Therefore, we purified G6PDH and OpcA from  
269 *Synechocystis* and studied the effect of the latter on G6PDH activity, as well as the effect of  
270 reducing and oxidizing agents on both proteins. As shown in **Figure 6A**, although G6PDH  
271 activity could be measured in the absence of OpcA, its substrate affinity increased by 6-fold  
272 when OpcA was added to the assay, confirming that OpcA acts as an allosteric activator of  
273 G6PDH in *Synechocystis*. When G6PDH was pre-incubated with reduced dithiothreitol

274 (DTT<sub>red</sub>), trans-4,5-Dihydroxy-1,2-dithiane (DTT<sub>ox</sub>) or CuCl<sub>2</sub> (which is known to induce  
275 formation of disulfide bonds), we could not detect any significant changes in G6PDH activity  
276 when the treated enzyme was assayed either in the absence or in the presence of untreated  
277 OpcA (**Figure 6B**), indicating that G6PDH itself is not sensitive to redox regulation. Pre-  
278 incubation of OpcA with DTT<sub>red</sub>, on the other hand, reduced G6PDH activity to ~ 30 % as  
279 compared to the control, and this inhibitory effect could be partially reverted when the  
280 reduced OpcA was re-oxidized by treatment with DTT<sub>ox</sub>. Moreover, pre-incubation of OpcA  
281 with *Synechocystis* thioredoxin TrxA had an even stronger inhibitory effect than DTT<sub>red</sub>,  
282 reducing G6PDH activity to 10 %, which was the level of activity measured in the absence of  
283 OpcA. Pre-incubation of OpcA with DTT<sub>ox</sub> and CuCl<sub>2</sub> did not affect G6PDH activity,  
284 suggesting that the untreated OpcA was already in its oxidized state. These results show that  
285 in *Synechocystis*, like in the filamentous heterocyst-forming cyanobacteria, the activity of  
286 G6PDH is regulated by the redox state of OpcA.

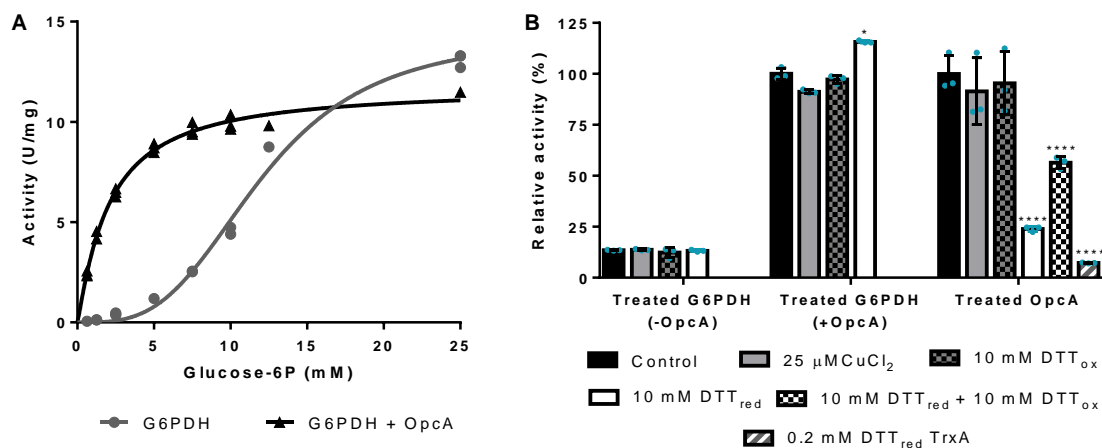

287

288 **Figure 6. OpcA acts as an allosteric activator of G6PDH when it is in its oxidized state.** (A) Effect of OpcA  
289 on the enzyme kinetics of G6PDH. OpcA was added as a 4:1 ratio to the amount of G6PDH. 3 replicates were  
290 measured for each data point. (B) Effect of incubating G6PDH or OpcA with reducing (DTT<sub>red</sub>) and oxidizing  
291 (DTT<sub>ox</sub> and CuCl<sub>2</sub>) agents on G6PDH activity. Assays were performed in the absence of the agents. 3 replicates  
292 were measured. Error bars represent the SD; asterisks represent the statistical significance.

### 293 **Pgm1, OpcA and G6PDH form a complex to facilitate metabolic channeling.**

294 The results presented above show the important role of Pgm1 phosphorylation in the  
295 regulation of glycogen metabolism. In an effort to find the protein phosphatase responsible for  
296 Pgm1 dephosphorylation during resuscitation, we analyzed the Pgm1 interactome through  
297 immunoprecipitation. Anti-Pgm1 antibodies were raised in rabbits and used to pull-down  
298 Pgm1 from cell extracts of resuscitating *Synechocystis* cells. Serum extracted from the

299 animals before immunization was used as a negative control. The proteins enriched in the  
300 precipitate were analyzed by quantitative proteome analysis. No protein phosphatase was  
301 found to be enriched, probably due to the transient interaction with their substrate.  
302 Surprisingly, G6PDH and OpcA were significantly enriched in the precipitate (**Figure S3**).  
303 Therefore, the interaction between these three proteins was analyzed in more detail using  
304 biolayer interferometry (BLI). His8-tagged Pgm1 was immobilized on a Ni-NTA biosensor  
305 and was allowed to associate with either Strep-tagged OpcA or Strep-tagged G6PDH. As a  
306 negative control, His8-tagged PII- $\Delta$ T-loop (a truncated version of *Synechocystis* PII protein,  
307 which is not expected to show interaction with the ligands) was immobilized to the biosensor  
308 and Strep-tagged OpcA or Strep-tagged G6PDH were used as ligands (**Figure 7A**). OpcA  
309 specifically bound to the sensor-immobilized Pgm1, but no binding of G6PDH to Pgm1 was  
310 detected. We then studied the formation of the Pgm1-OpcA-G6PDH complex in a two-step  
311 experiment, in which the sensor-immobilized Pgm1 was allowed to associate first to OpcA,  
312 and then, in a second step, to G6PDH (**Figure 7B**). This experiment showed that G6PDH  
313 could bind the sensor-bound Pgm1-OpcA complex, indicating that OpcA mediates the  
314 formation of the Pgm1-OpcA-G6PDH complex.

315 Since the results above showed that OpcA can only induce G6PDH activity when it is in its  
316 oxidized state, we studied the formation of the Pgm1-OpcA-G6PDH complex under reducing  
317 and oxidizing conditions. The oxidized OpcA (treated with 5 mM DTT<sub>ox</sub> for 30 min)  
318 interacted with the immobilized Pgm1, while the reduced OpcA (treated with 5 mM DTT<sub>red</sub>  
319 for 30 min) showed very poor binding (**Figure 7C**). To analyze the interaction of reduced and  
320 oxidized OpcA with G6PDH, His8-tagged G6PDH was immobilized to the Ni-NTA biosensor  
321 and allowed to interact with either oxidized or reduced OpcA (**Figure 7D**). The oxidized  
322 OpcA also showed better binding to the sensor-bound-G6PDH than the reduced OpcA. To  
323 determine whether the redox state of Pgm1 and G6PDH also influences the formation of the  
324 Pgm1-OpcA-G6PDH complex, the binding assays showed in **Figures 7C** and **7D** were  
325 repeated after treating the immobilized proteins (Pgm1 and G6PDH, respectively) with  
326 DTT<sub>red</sub> or DTT<sub>ox</sub>. The formation of the complex was slightly better when Pgm1 was in its  
327 oxidized state (**Figure S4A**), whereas no difference was observed between the reduced and  
328 oxidized G6PDH (**Figure S4B**). Interestingly, the phosphomimetic variant Pgm1 S63D did  
329 not show any binding to OpcA (**Figure S4C**). These results indicate that, when Pgm1 is  
330 dephosphorylated at Ser 63, it interacts with the OpcA-G6PDH complex in an oxidized state,  
331 thus forming a dynamic supramolecular complex of sequential metabolic enzymes.

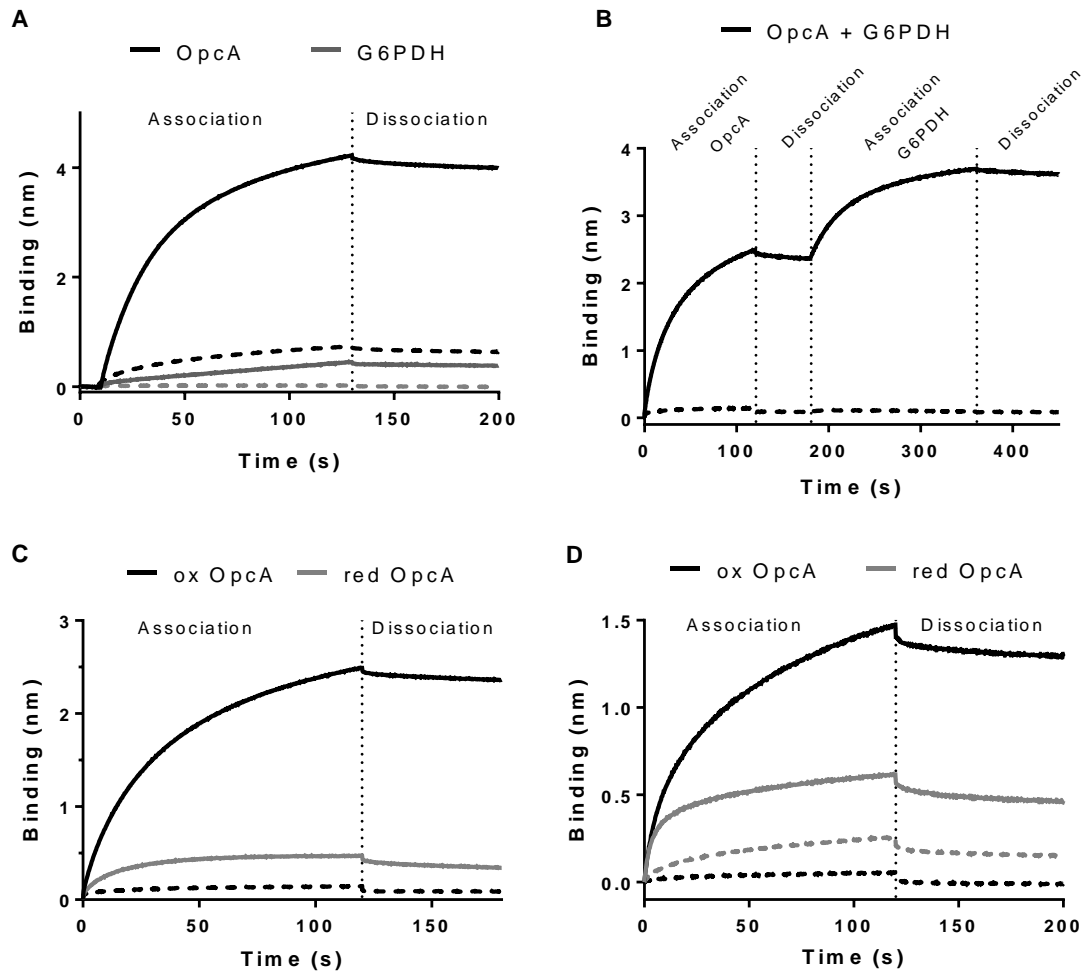

332

333 **Figure 7. Pgm1, OpcA and G6PDH transiently form a metabolon under oxidized conditions.** *In vitro*  
 334 analysis by Biolayer Interferometry of the interaction between Pgm1, OpcA and G6PDH. Solid lines: (A)(B)(C)  
 335 His8-tagged Pgm1 was immobilized on Ni-NTA sensor tips, (D) His8-tagged G6PDH was immobilized on Ni-  
 336 NTA sensor tips. Dashed lines: His8-tagged PII- $\Delta$ T-loop was immobilized on Ni-NTA sensor tips. (A) Sensor-  
 337 immobilized proteins were allowed to associate with either OpcA or G6PDH. (B) Sensor-immobilized proteins  
 338 were allowed to associate first with OpcA, then with G6PDH. (C) Sensor-immobilized proteins were allowed  
 339 to associate with oxidized or reduced OpcA. (D) Sensor-immobilized proteins were allowed to associate with  
 340 oxidized or reduced OpcA.

341 To determine its size, the Pgm1-OpcA-G6PDH complex was further analyzed via  
 342 multiangle light scattering coupled to size exclusion chromatography (SEC-MALS) (**Figure**  
 343 **S5**). When G6PDH was analyzed alone, most of the protein eluted in a peak with a MALS-  
 344 determined molar mass of  $242.9 \pm 0.02$  kDa, which corresponds to the tetrameric state of  
 345 G6PDH (4 x 59 kDa). Additionally, a smaller peak corresponding to the monomeric G6PDH  
 346 was detected, with a determined molar mass of  $59.56 \pm 0.071$  kDa (**Figure S5A**). OpcA and  
 347 Pgm1 alone mostly eluted as monomers ( $55.26 \pm 0.009$  kDa and  $63.61 \pm 0.025$  kDa,  
 348 respectively), although higher oligomeric states were also detected (**Figure S5B and C**).  
 349 When G6PDH was mixed with OpcA in equimolar concentrations, a dominant peak with a

350 molar mass of  $430.3 \pm 0.02$  kDa was observed, in addition to small amounts of monomeric  
351 OpcA (**Figure S5D and F**). The mass difference between the tetrameric G6PDH (4 x 59 kDa)  
352 and the G6PDH-OpcA complex (430 kDa) agrees with 4 subunits of OpcA (55 kDa) binding  
353 to the tetrameric G6PDH. Analysis of G6PDH, OpcA and Pgm1 together in equimolar  
354 concentrations revealed a new peak with a molar mass of  $705.57 \pm 0.009$  kDa, in addition to  
355 the previously detected peak of 430 kDa for the OpcA- G6PDH complex (**Figure S5E and**  
356 **D**). The apparent mass difference of 275 kDa agrees with four subunits of Pgm (4 x 63 kDa)  
357 binding to the OpcA-G6PDH complex. Overall, the tetrameric G6PDH seems to bind 4  
358 monomers of OpcA, each of which binds a Pgm1 monomer, forming a complex that appears  
359 to be stable due to the lack of decay detected in the chromatograms.

### 360 **Pgm1 regulation is conserved from bacteria to humans.**

361 Regulation of Pgm activity is crucial for the survival of a wide range of organisms to many  
362 different conditions. Interestingly, a homologous residue of the phosphorylation site Ser 63 of  
363 *Synechocystis* Pgm1 is also found in higher mammals, such as humans, mice and rabbits  
364 (**Figure 8A**). In humans, Pgm1 deficiency leads to glycogenosis, a metabolic disorder that  
365 causes the abnormal use and storage of glycogen.<sup>15</sup> Despite the importance of the correct  
366 activity of this enzyme on human health, little is known regarding its functional regulation.  
367 Although Ser 20 of the human Pgm1 (HPgm1), which is the homologous residue of  
368 *Synechocystis* Pgm1 Ser 63 in the human protein, has been identified as a phosphorylation  
369 site,<sup>16</sup> the role of phosphorylation of this residue has not been investigated. To ascertain  
370 whether phosphorylation of HPgm1 at Ser 20 has a similar effect than phosphorylation of Ser  
371 63 in *Synechocystis* Pgm1, we purified HPgm1 along with a mutant variant, in which Ser 20  
372 had been substituted by Asp (HPgm1 S20D), and measured their enzyme activities *in vitro*.  
373 As shown in **Figure 8B**, HPgm1 S20D showed no enzyme activity, indicating that, as in  
374 *Synechocystis*, HPgm1 activity may be regulated by phosphorylation at Ser 20.



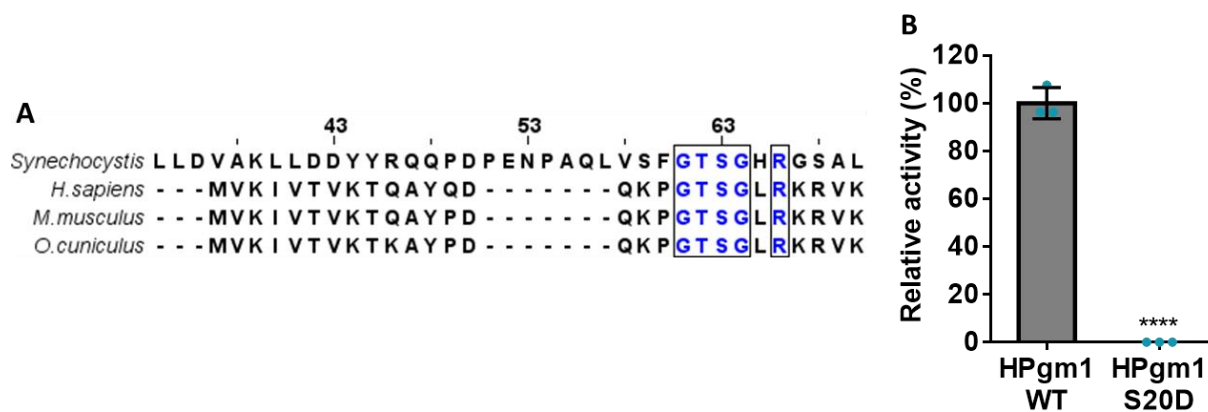

375

376 **Figure 8. Regulation of Pgm1 by phosphorylation is conserved in mammals.** (A) Alignment of the sequence  
 377 of Pgm1 from *Synechocystis*, *Homo sapiens*, *Mus musculus* and *Oryctolagus cuniculus*. The conserved motif is  
 378 marked in blue. (B) Relative *in vitro* activity of HPgm1 and HPgm1 S20D. The activity of WT Pgm1 was  
 379 considered to be 100%. At least 3 replicates were measured. Error bars represent the SD; asterisks represent the  
 380 statistical significance.

## 381 Discussion

382 Regulation of glycogen metabolism is of vital importance in organisms of all three  
 383 kingdoms of life. In bacteria, proper control of glycogen synthesis and degradation determines  
 384 the ability to survive transient periods of nutrient starvation. In mammals, deficiencies in  
 385 glycogen metabolism lead to a variety of different metabolic disorders, some of them very  
 386 severe. In this study, we used the unicellular cyanobacterium *Synechocystis* to investigate the  
 387 regulatory mechanisms of some of the key glycogen metabolic enzymes.

388 During nitrogen starvation, the activity of the glycogen catabolic enzymes must be  
 389 regulated to prevent premature glycogen degradation, so that cells can use this reserve  
 390 polymer once the conditions are favorable for resuscitation. We could show that this control is  
 391 exerted by the combined regulation of Pgm1 and G6PDH: Pgm1 is inactivated by  
 392 phosphorylation of Ser 63, whereas G6PDH is under a tight redox control.

393 Pgm is an evolutionary conserved enzyme that mediates one of the most important  
 394 reactions in carbohydrate metabolism: It catalyzes the interconversion between glucose-1P  
 395 and glucose-6P, being thereby involved in both, glycogen synthesis and degradation.<sup>17</sup>  
 396 Despite its important role in sugar metabolism, Pgm activity has only recently started to be  
 397 considered as a target for metabolic control.<sup>18-21</sup> At the onset of nitrogen starvation, the  
 398 activity of the Pgm1 isoform is required for glycogen synthesis, as shown by the inability of a  
 399 Pgm1 knock-out mutant to synthesize glycogen. Once enough glycogen has been  
 400 accumulated, Pgm1 activity is inhibited by phosphorylation of Ser 63. When in addition to the  
 401 WT Pgm1, the non-phosphorylated S63A variant is present, cells degrade glycogen after

402 prolonged nitrogen starvation and concomitantly lose viability. This highlights the pivotal role  
403 of Ser 63 phosphorylation for controlling glycogen catabolism. This residue is highly  
404 phosphorylated in long-term-chlorotic cells and it is progressively de-phosphorylated during  
405 resuscitation. *In vitro* characterization of a phosphomimic variant of Pgm1 (Pgm1 S63D)  
406 strongly suggests that the phosphorylated version of the enzyme is inactive. Analysis of other  
407 Pgm1 variants (Pgm1 S63A, S63G, and S63T) indicated that substitution of Ser 63 affects  
408 catalysis, as their  $V_{max}$  was much lower as compared to WT Pgm1, although the substrate  
409 affinity was not impaired (as deduced from the  $K_m$  value). Based on structural studies of the  
410 reaction mechanism from related proteins,<sup>22</sup> we suggest a role of Ser 63 in a conformational  
411 change occurring during catalysis. When Pgm1 is in its open conformation, its catalytic cleft  
412 is easily accessible for phosphorylated sugars. When glucose-P enters the catalytic site, the  
413 unphosphorylated end of the sugar binds the phosphorylated Ser 168 (see **Figure 2**). The  
414 phosphorylated end of the glucose molecule must interact with the phosphate-binding residues  
415 present in domain 4. In order for these residues to come in close contact, Pgm1 must undergo  
416 a conformational change that involves a rotation of domain 4 and changes the active site from  
417 an open cleft to a closed pocket. This conformational change requires the interaction of a  
418 group of residues from domain 4 with a group of residues from domain 1, including Ser 63.<sup>23</sup>  
419 This explains why any change of Ser 63 has a negative effect on catalysis. When the site of  
420 Ser 63 is occupied by a negative residue, as in the phosphomimetic variant, or when the seryl-  
421 residue is phosphorylated, the negative charge obstructs this conformational change,  
422 preventing the closed conformation of the enzyme and thereby inhibiting catalysis.

423 Strikingly, this regulatory phosphorylation site located in domain 1 of Pgm1 is conserved  
424 in higher organisms, including mouse, rabbit and human. Although Pgm1 deficiency can  
425 cause severe disease in humans, its functional regulation remains under-investigated. HPgm1  
426 is known to be phosphorylated and thereby activated by the p21-activated signaling kinase 1  
427 (Pak1) on Thr 466.<sup>17</sup> However, although Ser 20, the homologous of *Synechocystis* Ser 63, had  
428 previously been reported as a phosphorylation site in HPgm1,<sup>16</sup> the role of this  
429 phosphorylation on enzyme activity had not been characterized. We were able to demonstrate  
430 that, as in *Synechocystis*, HPgm1 is also inactivated by phosphorylation at Ser 20. In  
431 agreement with our results, a study involving patients suffering from Pgm1 deficiency showed  
432 that mutations on the loop in domain 1 where Ser 20 is located in HPgm1 led to a reduced  
433 enzyme activity (3.3% of the control) and caused moderate disease in heterozygote patients.<sup>23</sup>  
434 These findings suggest that the regulatory mechanism discovered in this study is evolutionary  
435 conserved.

436 Analysis of the steady-state levels of metabolites of glycogen degradation showed high  
437 accumulation of glucose-6P, implying that Pgm1 is not the only control point, but also the  
438 enzymes that catalyze the glucose-6P consuming reactions are regulated. Although catabolism  
439 of the bulk of the glycogen reserves must be prevented during nitrogen starvation, residual  
440 glycogen synthesis and degradation constantly takes place in chlorotic cells:<sup>24</sup> A residual  
441 carbon flux through the glycogen catabolic pathways results in synthesis of polyhydroxy  
442 butyrate (PHB) during prolonged nitrogen starvation. The data presented here also supports  
443 the existence of such residual flux, given the considerable glycogen degradation and loss of  
444 viability in the WT+Pgm1S63A strain after long-term starvation. This minimal metabolic  
445 activity is necessary to maintain the minimum ATP levels to keep viability in dormant cells.<sup>25</sup>  
446 As mentioned above, glycogen can be catabolized via three different routes: The EMP, the  
447 ED and the OPP pathways. G6PDH directs glucose-6P into the OPP and ED pathways,  
448 whereas the glucose-6-phosphate isomerase (Pgi) leads it into the EMP pathway. Koch et al.<sup>24</sup>  
449 showed that the main carbon flux from glycogen to PHB synthesis in chlorotic cells happens  
450 through the EMP pathway, which is the route with the highest ATP yield, whereas the OPP  
451 and ED pathways seem to play a minor role in this process. Our data indicate that G6PDH is  
452 inactive in chlorotic cells. The cytoplasm of nitrogen-starved cells is a reducing environment:  
453 When cells are nitrogen-depleted, anabolic processes stop consuming the electrons provided  
454 by photosynthetic reactions and reducing equivalents accumulate.<sup>26</sup> Under these conditions,  
455 OpcA should be reduced by the Trx system, and would be unable to activate G6PDH.  
456 However, when a nitrogen source is added to chlorotic cells, the glycogen pool is mainly  
457 mobilized through the ED and OPP pathways, and not through the EMP pathway. Although  
458 the latter is energetically more productive than the OPP and ED pathways, it does not  
459 generate the necessary metabolic intermediates to re-build the previously degraded cellular  
460 components in nitrogen-starved cells and it is therefore not the preferred route for  
461 carbohydrate degradation during resuscitation<sup>8</sup>, or during heterotrophic growth in general.<sup>27</sup>  
462 Upon addition of a nitrogen source, the glutamine synthetase – glutamate synthetase (GS-  
463 GOGAT) nitrogen assimilation cycle is immediately induced.<sup>7,25</sup> The GOGAT reaction,  
464 which produces glutamate from glutamine and 2-oxoglutarate, consumes reduction  
465 equivalents, thereby alleviating the over-reduced state of the cytoplasm, which would allow  
466 activation of G6PDH by OpcA and utilization of the ED and OPP pathways.

467 Oxidation of OpcA and dephosphorylation of Pgm1 triggered by nitrate addition also  
468 allows the formation of the Pgm1-OpcA-G6PDH complex. Although transient interaction  
469 between sequential metabolic enzymes has been observed in a variety of pathways, the

470 purpose of enzyme assembly remains uncertain. Control of the metabolic flux at a branch  
471 point of a pathway has been proposed as a key role of enzyme complex formation: Enzyme  
472 assembly may allow channeling of the metabolic product from one enzyme to the next one,  
473 avoiding its use by a competing enzyme at a branch point in a metabolic network. In such  
474 case, the enzymatic complexes are known as metabolons. However, the functional  
475 significance of metabolon formation has not yet been fully clarified.<sup>28</sup> Catabolism of glucose-  
476 6P represents a branch point in glycogen degradation. The data derived from the  
477 characterization of mutants in key enzymes of the glycogen catabolic pathways strongly  
478 suggests that, upon nitrogen addition, the carbon flow is switched from the EMP to the ED  
479 and OPP pathways,<sup>8,24</sup> although both G6PDH and Pgi are up-regulated in recovering cells,<sup>9</sup>  
480 suggesting the existence of a regulatory mechanism in the control of metabolic flux. We  
481 propose that the Pgm1-OpcA-G6PDH complex acts as a metabolon that channels glucose-6P  
482 towards the ED and OPP pathways, which provide the metabolites and reduction equivalents  
483 required for resuscitation from chlorosis, thereby preventing it from being utilized by Pgi. The  
484 fact that the interaction between OpcA, Pgm1 and G6PDH is favored under oxidizing  
485 conditions and when Pgm1 is dephosphorylated suggests that formation of the Pgm1-OpcA-  
486 G6PDH complex is induced during the transition to heterotrophic growth, when functionality  
487 of the OPP and ED pathways is required. Thus, the Pgm1-OpcA-G6PDH metabolon is  
488 probably also relevant in the light-dark transitions. Altogether, our study sheds new light on  
489 the regulation of the central glycogen metabolic hub, which is at the core of carbohydrate  
490 metabolism. Tight regulation of the bi-directional Pgm1 is thereby of special relevance, with  
491 its regulation through seryl-phosphorylation being evolutionary conserved from cyanobacteria  
492 to humans.

## 493 **Acknowledgements**

494 We thank Samuel Quinzer for his involvement in G6PDH enzymatic assays, Dr. Nicolas  
495 Nalpas for his help with the proteomics data, and Dr. Libera Lo Presti for her assistance  
496 writing this manuscript. This work was supported by the German Research Council (DFG)  
497 FOR 2816 “The Autotrophy-Heterotrophy Switch in Cyanobacteria: Coherent Decision-  
498 Making at Multiple Regulatory Layers”. LC-MS/MS systems at the Department of  
499 Quantitative Proteomics were supported by the DFG grants INST 37/935-1 and INST 37/741-  
500 1 FUGG. Additionally, we acknowledge the infrastructural support from EXC 2124  
501 “Controlling Microbes to Fight Infections”.

## 502 **Author contributions**

503 S.D. performed cultivation experiments, cloning, protein purification, enzymatic assays,  
504 glycogen and glucose-phosphate determinations, BLI experiments, SEC-MALS experiments,  
505 constructed mutants, analyzed data, and wrote manuscript with input from all authors. N.N.  
506 contributed cloning and BLI experiments. P.S performed proteomic analysis. K.F. conceived  
507 study, interpreted data and edited manuscript.

## 508 **Competing interests**

509 The authors declare no competing financial interest.

## 510 **Methods**

### 511 **Cyanobacterial cultivation**

512 The cyanobacterial strains used in this study are listed in **Table S1**. All strains were grown  
513 in BG<sub>11</sub> supplemented with 5 mM NaHCO<sub>3</sub> for vegetative growth, as described previously.<sup>29</sup>  
514 Nitrogen starvation was induced as previously described by a 2-step wash with BG<sub>11-0</sub>  
515 medium supplemented with 5 mM NaHCO<sub>3</sub>, which contains all BG<sub>11</sub> components except for  
516 NaNO<sub>3</sub>.<sup>7,30</sup> Resuscitation was induced by addition of 17 mM NaNO<sub>3</sub> to cells residing in BG<sub>11-</sub>  
517 0. Cultivation was performed with continuous illumination (50 to 60  $\mu\text{mol photons m}^{-2} \text{s}^{-1}$ )  
518 and shaking (130 to 140 rpm) at 27 °C. Mutant strains were cultivated with the appropriate  
519 concentration of antibiotics.<sup>8</sup> All strains used for this study are shown in **Table S1**. Biological  
520 replicates were inoculated from the same pre-cultures, but propagated, nitrogen-starved and  
521 resuscitated independently in different flasks under identical conditions.

### 522 **Protein overexpression and purification**

523 *Escherichia coli* Rosetta-gami (DE3) was used for the overexpression of all proteins. All  
524 primers and plasmids used for protein overexpression are shown in **Table S2** and **Table S3**,  
525 respectively. Cells were cultivated in 2xYT (1L of culture in 5L flasks) at 37 °C until they  
526 reached exponential growth (OD<sub>600</sub> 0.6-0.8) and protein overexpression was then induced by  
527 adding either 0.1 mM IPTG (for His-tagged proteins) or 75  $\mu\text{g/L}$  anhydrotetracycline (for  
528 Strep-tagged proteins), followed by incubation at 20°C for 16 h. Cells were harvested by  
529 centrifugation at 4000 g for 10 min at 4 °C, and disrupted by sonication in 40 mL of lysis

530 buffer (100 mM Tris-HCl pH 7.5, 150 mM KCl, 5 mM MgCl<sub>2</sub>, 10 mM imidazole (only for  
531 His-tagged proteins), DNase, and protease inhibitor cocktail). The cell lysates were  
532 centrifuged at 20,000 g for 1 h at 4°C and the supernatants were filtered with a 0.22 µm filter.

533 For the purification of His-tagged proteins, 1 mL Ni-NTA HisTrap columns (GE  
534 Healthcare, Illinois, USA) were used. The cell extracts were loaded into the columns, washed  
535 with wash buffer (100 mM Tris-HCl pH 7.5, 150 mM KCl, and 50 mM Imidazole) and eluted  
536 with elution buffer (100 mM Tris-HCl pH 7.5, 150 mM KCl, and 500 mM Imidazole).

537 For the purification of Strep-tagged proteins, 5 mL Ni-NTA Strep-tactin® superflow  
538 (Qiagen, Maryland, USA) columns were used. The cell extracts were loaded into the  
539 columns, washed with wash buffer (100 mM Tris-HCl pH 7.5 and 150 mM KCl) and eluted  
540 with elution buffer (100 mM Tris-HCl pH 7.5, 150 mM KCl, and 2.5 mM desthiobiotin).

541 The buffer of all purified proteins was exchanged via dialysis using dialysis buffer (100  
542 mM Tris-HCl pH 7.5, 150 mM KCl, and 5 mM MgCl<sub>2</sub>) and a 3 kDa cutoff dialysis tube. 1  
543 mM DTT was also added to the dialysis buffer for Pgm1 and HPgm1. All purifications were  
544 checked via SDS-PAGE.

#### 545 **Measurement of Pgm activity in cell extracts**

546 To determine the Pgm activity in *Synechocystis* cell extracts an assay was adapted from  
547 Osanai et al.<sup>31</sup> The Pgm reaction was coupled to the G6PDH reaction and the glucose 6-  
548 phosphate-dependent conversion of NADP<sup>+</sup> to NADPH was monitored by measuring the  
549 absorbance at 340 nm. Cells were harvested by centrifugation at 4000 g for 10 min at 4 °C,  
550 resuspended in lysis buffer (100 mM Tris-HCl pH 7.5, 10 mM MgCl<sub>2</sub>) and disrupted by using  
551 a "FastPrep®-24"(MP Biomedicals). The lysate was centrifuged for 10 min at 4 °C before the  
552 protein content was determined. When indicated, cell lysates were treated with 2 U/mL of  
553 alkaline phosphatase for 1 h at 37 °C. Approximately 50 µg of protein were used for each  
554 reaction. The reaction buffer was composed of 100 mM Tris-HCl pH 7.5, 10 mM MgCl<sub>2</sub>, 1  
555 mM NADP<sup>+</sup>, 1 mM DTT and 1 U/mL G6PDH from *Saccharomyces cerevisiae* (G6378,  
556 Sigma Aldrich, Missouri, USA). The reaction was started by the addition of 10 mM glucose-  
557 1P. Absorption change at 340 nm was continuously measured for 15 min at 30 °C. As a blank,  
558 the change in absorption in the absence of glucose-1P was also measured and subtracted from  
559 the experimental values. The enzymatic activity was then calculated. At least three biological  
560 replicates were measured.

### 561 **Measurement of Pgm activity *in vitro***

562 The reaction buffer was composed of 100 mM Tris-HCl pH 7.5, 150 mM KCl, 10 mM  
563 MgCl<sub>2</sub>, 1 mM NADP<sup>+</sup>, 1 mM DTT and 1 U/mL G6PDH from *Saccharomyces cerevisiae*  
564 (G6378, Sigma Aldrich). 100 ng of His-tagged purified Pgm were added to each reaction. The  
565 reaction was started by the addition of glucose-1P and 40 μM glucose-1,6-bisphosphate.  
566 Absorption change at 340 nm was continuously measured for 15 min at 30 °C. The enzymatic  
567 activity was then calculated. At least three replicates were measured.

### 568 **Measurement of G6PDH activity *in vitro***

569 The reaction buffer was composed of 100 mM Tris-HCl pH 7.5, 150 mM KCl, 10 mM  
570 MgCl<sub>2</sub> and 1 mM NADP<sup>+</sup>. 500 ng of Strep-tagged purified G6PDH were added to each  
571 reaction. When indicated, OpcA was added on 1:4 molar ratio to G6PDH. When stated, the  
572 enzymes were pre-treated with DTT<sub>red</sub>, DTT<sub>ox</sub> or CuCl<sub>2</sub> at the concentration and for the time  
573 indicated in the figure legends, but enzyme activity was always measured in the absence of  
574 reducing or oxidizing agents. The reaction was started by the addition of 10 mM glucose-6P.  
575 Absorption change at 340 nm was continuously measured for 15 min at 30 °C. The enzymatic  
576 activity was then calculated. At least three replicates were measured.

### 577 **Recovery assay**

578 Serial dilutions of chlorotic cultures were prepared (10<sup>0</sup>, 10<sup>-1</sup>, 10<sup>-2</sup>, 10<sup>-3</sup>, 10<sup>-4</sup> and 10<sup>-5</sup>)  
579 starting with an OD<sub>750</sub> of 1. 5 μl of these dilutions were dropped on solid BG<sub>11</sub> agar plates and  
580 cultivated at 50 μmol photons m<sup>-2</sup> s<sup>-1</sup> and 27 °C for five days.

### 581 **Glycogen determination**

582 Glycogen content was determined as described by Gründel et al.<sup>12</sup> with modifications  
583 established by Klotz et al.<sup>7</sup> 2 mL-samples were collected, spun down and washed with  
584 distilled water. Cells were lysed by incubation in 30% KOH at 95°C for 2h. Glycogen was  
585 precipitated by addition of cold ethanol to a final concentration of 70% followed by an  
586 overnight incubation at -20 °C. The precipitated glycogen was pelleted by centrifugation at  
587 15000 g for 10 min and washed with 70% ethanol and 98% absolute ethanol, consecutively.  
588 The precipitated glycogen was dried and digested with 35 U of amyloglucosidase (10115,  
589 Sigma Aldrich) in 1 mL of 100 sodium acetate pH 4.5 for 2 h. 200 μl of the samples were  
590 mixed with 1 mL of 6% O-toluidine in acetic acid and incubated at 100 °C for 10 min.

591 Absorbance was then read at 635 nm. A glucose calibration curve was used to determine the  
592 amount of glycogen in the samples. For every condition, at least three biological replicates  
593 were measured.

#### 594 **Glucose-phosphate quantification**

595 4 mL of chlorotic and resuscitating (24 h after NaNO<sub>3</sub> addition) were harvested (OD<sub>750</sub> ~  
596 0.8) by centrifugation at 18,000 g for 1 min at 4°C. Pellets were immediately frozen in liquid  
597 nitrogen. Cells were lysed by addition of 0.2 M HCl and incubation at 95 °C for 15 min.  
598 Lysates were centrifuged at 18,000 g for 10 min at room temperature, then the supernatants  
599 were transferred to clean 2 mL tubes. Samples were neutralized with 1 mL of 1 M Tris-HCl  
600 pH 8. A glucose-1P and glucose-6P calibration curve were prepared. NADP<sup>+</sup>, KCl, and  
601 MgCl<sub>2</sub> were added to samples and standard solutions to a final concentration of 1 mM, 150  
602 mM and 10 mM, respectively. The absorbance of samples and standards were measured at  
603 340 nm (blank measurement). 3 U of G6PDH from *Saccharomyces cerevisiae* (G6378, Sigma  
604 Aldrich) were added to all samples and standards and their absorbance at 340 nm was  
605 measured after incubation for 5 min at room temperature (glucose-6P measurement). 3 U of  
606 Pgm from rabbit muscle (P3397, Sigma) were added to all samples and glucose-1P standards  
607 and their absorbance at 340 nm was measured after incubation for 5 min at room temperature  
608 (glucose-1P measurement). The blank measurements were subtracted from the glucose-6P  
609 measurements, and the glucose-6P standard curve was used to determine the concentration of  
610 glucose-6P in the samples. The glucose-6P measurements were subtracted from the glucose-  
611 1P measurements, and the glucose-1P standard curve was used to determine the concentration  
612 of glucose-1P in the samples. Data were normalized to the OD<sub>750</sub> of the sampled cultures.  
613 Three biological replicates were measured.

#### 614 **Pull down assay**

615 A pull down assay was performed 4 h after the addition of nitrate to chlorotic cells.  
616 Therefore, 250 mL cultures of *Synechocystis* cells were cultivated and nitrogen-starved as  
617 described above in three independent biological replicates per condition. Cells were harvested  
618 by centrifugation at 4,000 x g for 10 min and cell pellets were resuspended in 2 mL of lysis  
619 buffer (50 mM Tris-HCl, pH 7.4) before lysis with a FastPrep®-24 Ribolyser at 4 °C (3  
620 cycles at 7.5 m s<sup>-1</sup> for 30 s and 5 min breaks in between). Cell extracts were centrifuged at  
621 16,000 x g for 5 min at 4 °C and supernatants were transferred to a new 1.5 mL tubes. Protein



622 G Magnetic Beads were aliquoted (150  $\mu$ l) and washed twice with 1 mL of lysis buffer. Then  
623 either pre-immune serum or post-immunization anti-Pgm1 antiserum (PINEDA, Berlin,  
624 Germany) was added to the beads and they were incubated for 10 min at RT under agitation  
625 on an orbital shaker. Beads were washed again and incubated with the cell extracts for 10 min  
626 at RT, then washed again. Proteins were eluted in 2 consecutive steps with 60  $\mu$ l of elution  
627 buffer (200 mM glycine, pH 2.5) each. Both fractions were combined and protein  
628 concentration was measured. Pull down eluates were precipitated by the addition of 9 sample  
629 volumes of a 8:1 v/v ice-cold acetone:methanol mixture and incubated o.n. at  $-20^{\circ}\text{C}$ . Protein  
630 precipitates were pelleted (5 min 1000 x g at RT) and washed twice with each 1 mL 80% v/v  
631 acetone aq. The resulting protein pellet was air-dried and resuspended in 20  $\mu$ L denaturation  
632 buffer. Protein concentrations were measured by Bradford assay and 10  $\mu$ g protein per sample  
633 were treated with dithiothreitol (1 mM) and subsequently iodoacetamide (5.5 mM) for each  
634 60 min at RT. Samples were digested with 1  $\mu$ g Lys-C for 3 h, then diluted 1:5 with 20 mM  
635 ABC buffer pH 8.0 followed by addition of 1  $\mu$ g trypsin and incubation o.n. at RT while  
636 shaking. The peptide solution was cleaned by stage-tips.<sup>32</sup> LC-MS analysis was performed as  
637 described before on a Q Exactive HF or HF-X as described elsewhere.<sup>9</sup> Raw data was  
638 analyzed via MaxQuant 1.6.8.0 using a Target/Decoy Database from Cyanobase  
639 (*Synechocystis* sp. PCC 6803; 10.06.2014, user-modified) with 3671 protein IDs. Label -free  
640 quantification algorithm was used to calculate LFQ intensities. Data from all pull down  
641 experiments was analyzed via the Perseus software (version 1.6.5.0). For the identification of  
642 significantly enriched proteins, a t-test was performed with the following requirements: each  
643 protein had to be detected in at least two replicates and an FDR of 0.001 at  $S0 = 0.3$  was set.

#### 644 **Biolayer interferometry using the Octet K2 system**

645 Protein-protein interaction was tested *in vitro* by biolayer interferometry using the Octet  
646 K2 system (FortéBio). All experiments were performed in HEPES buffer (100 mM HEPES-  
647 KOH PH 7.5 and 10 mM  $\text{MgCl}_2$ ). For the experiments with one Association/Dissociation  
648 step, either His8-Pgm1 or His8-tagged G6PDH was immobilized on Ni-NTA sensor tips  
649 (FortéBio) by exposing the sensors to a 500 nM solution of Pgm1 for 120 s (Loading),  
650 followed by a 60 s baseline measurement. To avoid unspecific binding, the sensor tips were  
651 then dipped in a solution containing 600 nM of His8-P11, followed by a second 60 s baseline  
652 measurement. For the binding of OpcA and Zwf, the sensor tips dipped in either a 500 nM  
653 solution of Strep-OpcA or a 500 mM solution of Strep-G6PDH for 120 s (Association). When  
654 indicated, these proteins were pre-treated with either 5mM  $\text{DTT}_{\text{red}}$  or 5 mM  $\text{DTT}_{\text{ox}}$  for 30

655 min. The assay was finalized with a 120 s Dissociation step. As a control, Loading was done  
656 using His8-P<sub>II</sub> instead of His8-P<sub>gm1</sub>. For the experiments with two Association/Dissociation  
657 steps, the sensors tips were first loaded with P<sub>gm1</sub> as described above. In the first Association  
658 step, the sensors were exposed to a 500 nM Strep-OpcA solution, followed by a first  
659 Dissociation step. In the second Association step, the same sensors were dipped in a 500 nM  
660 Strep-G6PDH solution, followed by a second Dissociation step. As a control, Loading was  
661 done using His8-P<sub>II</sub>- $\Delta$ T-loop instead of His8-P<sub>gm1</sub>. The biosensors were regenerated after  
662 each use with 10 mM glycine (pH 1.7) and 10 mM NiCl<sub>2</sub> as proposed in manufacturers  
663 recommendations. The recorded curves were aligned to the baseline before the Association  
664 step.

### 665 **Size exclusion chromatography multiangle light scattering (SEC-MALS)**

666 SEC-MALS experiments were performed using an ÄKTA purifier system connected to a  
667 Superose 6 Increase 10/300 GL column (GE healthcare) at a flow rate of 0.4 ml/min in  
668 running buffer (100 mM Tris-HCl pH 7.5, 150 mM K<sub>2</sub>SO<sub>4</sub>, and 10 mM MgCl<sub>2</sub>). The column  
669 was calibrated using the gel filtration calibration kit LMW and HMW (GE Healthcare)  
670 according to the manufacturer's instructions. To analyze the oligomeric state of the  
671 recombinant proteins, the ÄKTA micro was connected to downstream MALS using the  
672 miniDAWN TREOS combined with an Optilab T-rEX refractometer (Wyatt Technology,  
673 Dernbach, Germany). Data analysis was performed using the software ASTRA 7 (Wyatt  
674 Technology) and Unicorn 5.20 (Build 500) (General Electric Company, Boston, USA).

### 675 **Statistical analysis**

676 Statistical details for each experiment can be found in the figure legends. Samples taken  
677 from cultures that were inoculated with the same pre-cultures, but propagated, nitrogen-  
678 starved and resuscitated independently in different flasks under identical conditions were  
679 considered different biological replicates. GraphPad PRISM was used to perform paired  
680 Student's t-tests to determine the statistical significance. Asterisks in the figures were used to  
681 symbolize the p-value: One asterisk represents  $p \leq 0.05$ , two asterisks  $p \leq 0.01$ , three asterisks  
682  $p \leq 0.001$ , and four asterisks  $p \leq 0.0001$ .

683 **Data availability**

684 Proteome raw data files acquired by mass spectrometry were deposited at the  
685 ProteomeXchange Consortium via the Proteomics Identifications Database partner  
686 repository<sup>33</sup> under the identifier PXD024024. FOR REVIEWERS ONLY: Username:  
687 reviewer\_pxd024024@ebi.ac.uk; Password: YDi7Sztw

## 688 **References**

- 689 1. Prats, C., Graham, T. E. & Shearer, J. The dynamic life of the glycogen granule. *J.*  
690 *Biol. Chem.* **293**, 7089–7098 (2018).
- 691 2. Klotz, A. & Forchhammer, K. Glycogen, a major player for bacterial survival and  
692 awakening from dormancy. *Future Microbiol.* **12**, 101–104 (2017).
- 693 3. Welkie, D. G. *et al.* A Hard Day’s Night: Cyanobacteria in Diel Cycles. *Trends*  
694 *Microbiol.* **27**, 231–242 (2019).
- 695 4. Preiss, J. Bacterial glycogen synthesis and its regulation. *Annu. Rev. Microbiol.* 419–  
696 458 (1984).
- 697 5. Forchhammer, K. & Schwarz, R. Nitrogen chlorosis in unicellular cyanobacteria – a  
698 developmental program for surviving nitrogen deprivation. *Environ. Microbiol.* **21**,  
699 1173–1184 (2019).
- 700 6. Schwarz, R. & Forchhammer, K. Acclimation of unicellular cyanobacteria to  
701 macronutrient deficiency: Emergence of a complex network of cellular responses.  
702 *Microbiology* **151**, 2503–2514 (2005).
- 703 7. Klotz, A. *et al.* Awakening of a Dormant Cyanobacterium from Nitrogen Chlorosis  
704 Reveals a Genetically Determined Program. *Curr. Biol.* **26**, 2862–2872 (2016).
- 705 8. Doello, S., Klotz, A., Makowka, A., Gutekunst, K. & Forchhammer, K. A specific  
706 glycogen mobilization strategy enables rapid awakening of dormant cyanobacteria  
707 from chlorosis. *Plant Physiol.* **177**, 594–603 (2018).
- 708 9. Spät, P., Klotz, A., Rexroth, S., Maček, B. & Forchhammer, K. Chlorosis as a  
709 developmental program in cyanobacteria: The proteomic fundament for survival and  
710 awakening. *Mol. Cell. Proteomics* **17**, 1650–1669 (2018).
- 711 10. Liu, L., Hu, H. H., Gao, H. & Xu, X. D. Role of two phosphohexomutase genes in  
712 glycogen synthesis in *Synechocystis* sp. PCC6803. *Chinese Sci. Bull.* **58**, 4616–4621  
713 (2013).
- 714 11. Osanai, T. *et al.* Pathway-level acceleration of glycogen catabolism by a response  
715 regulator in the cyanobacterium *synechocystis* species PCC 6803. *Plant Physiol.* **164**,  
716 1831–1841 (2014).
- 717 12. Gründel, M., Scheunemann, R., Lockau, W. & Zilliges, Y. Impaired glycogen synthesis

- 718 causes metabolic overflow reactions and affects stress responses in the cyanobacterium  
719 *Synechocystis* sp. PCC 6803. *Microbiol. (United Kingdom)* **158**, 3032–3043 (2012).
- 720 13. Mihara, S. *et al.* Thioredoxin regulates G6PDH activity by changing redox states of  
721 OpcA in the nitrogen-fixing cyanobacterium *Anabaena* sp. PCC 7120. *Biochem. J.* **475**,  
722 1091–1105 (2018).
- 723 14. Hagen, K. D. & Meeks, J. C. The Unique Cyanobacterial Protein OpcA Is an Allosteric  
724 Effector of Glucose-6-phosphate Dehydrogenase in *Nostoc punctiforme* ATCC 29133.  
725 *J. Biol. Chem.* **276**, 11477–11486 (2001).
- 726 15. Lee, Y., Stiers, K. M., Kain, B. N. & Beamer, L. J. Compromised catalysis and  
727 potential folding defects in in vitro studies of missense mutants associated with  
728 hereditary phosphoglucomutase 1 deficiency. *J. Biol. Chem.* **289**, 32010–32019 (2014).
- 729 16. Bian, Y. *et al.* An enzyme assisted RP-RPLC approach for in-depth analysis of human  
730 liver phosphoproteome. *J. Proteomics* **96**, 253–262 (2014).
- 731 17. Gururaj, A., Barnes, C. J., Vadlamudi, R. K. & Kumar, R. Regulation of  
732 phosphoglucomutase 1 phosphorylation and activity by a signaling kinase. *Oncogene*  
733 **23**, 8118–8127 (2004).
- 734 18. Bro, C., Knudsen, S., Regenber, B., Olsson, L. & Nielsen, J. Improvement of  
735 galactose uptake in *Saccharomyces cerevisiae* through overexpression of  
736 phosphoglucomutase: Example of transcript analysis as a tool in inverse metabolic  
737 engineering. *Appl. Environ. Microbiol.* **71**, 6465–6472 (2005).
- 738 19. Jin, G. Z. *et al.* Phosphoglucomutase 1 inhibits hepatocellular carcinoma progression  
739 by regulating glucose trafficking. *PLoS Biol.* **16**, 1–27 (2018).
- 740 20. Malinova, I. *et al.* Reduction of the cytosolic phosphoglucomutase in *Arabidopsis*  
741 reveals impact on plant growth, seed and root development, and carbohydrate  
742 partitioning. *PLoS One* **9**, 1–11 (2014).
- 743 21. Seibold, G. M. & Eikmanns, B. J. Inactivation of the phosphoglucomutase gene *pgm* in  
744 *Corynebacterium glutamicum* affects cell shape and glycogen metabolism. *Biosci. Rep.*  
745 **33**, 645–654 (2013).
- 746 22. Müller, S. *et al.* Crystal structure analysis of the exocytosis-sensitive phosphoprotein,  
747 pp63/parafusin (phosphoglucomutase), from paramecium reveals significant  
748 conformational variability. *J. Mol. Biol.* **315**, 141–153 (2002).

- 749 23. Beamer, L. J. Mutations in hereditary phosphoglucomutase 1 deficiency map to key  
750 regions of enzyme structure and function. *J. Inherit. Metab. Dis.* **38**, 243–256 (2015).
- 751 24. Koch, M., Doello, S., Gutekunst, K. & Forchhammer, K. PHB is produced from  
752 Glycogen turn-over during nitrogen starvation in *Synechocystis* sp. PCC 6803. *Int. J.*  
753 *Mol. Sci.* **20**, 1942 (2019).
- 754 25. Doello, S., Burkhardt, M. & Forchhammer, K. The essential role of sodium  
755 bioenergetics and ATP homeostasis in the developmental transitions of a  
756 cyanobacterium. *Curr. Biol.* **31**, 1–10 (2021).
- 757 26. Hauf, W. *et al.* Metabolic changes in *Synechocystis* PCC6803 upon nitrogen-  
758 starvation: Excess NADPH sustains polyhydroxybutyrate accumulation. *Metabolites* **3**,  
759 101–118 (2013).
- 760 27. Makowka, A. *et al.* Glycolytic shunts replenish the Calvin-Benson-Bassham cycle as  
761 anaplerotic reactions in Cyanobacteria. *Mol. Plant* **13**, 471–482 (2020).
- 762 28. Sweetlove, L. J. & Fernie, A. R. The role of dynamic enzyme assemblies and substrate  
763 channelling in metabolic regulation. *Nat. Commun.* **9**, 2136 (2018).
- 764 29. Rippka, R., Deruelles, J., Waterbury, J. B., Herdman, M. & Stanier, R. Y. Generic  
765 Assignments, Strain Histories and Properties of Pure Cultures of Cyanobacteria.  
766 *Microbiology* **111**, 1–61 (1979).
- 767 30. Schlebusch, M. & Forchhammer, K. Requirement of the nitrogen starvation-induced  
768 protein s110783 for polyhydroxybutyrate accumulation in *synechocystis* sp. strain PCC  
769 6803. *Appl. Environ. Microbiol.* **76**, 6101–6107 (2010).
- 770 31. Osanai, T. *et al.* Genetic engineering of group 2  $\sigma$  factor SigE widely activates  
771 expressions of sugar catabolic genes in *Synechocystis* species PCC 6803. *J. Biol.*  
772 *Chem.* **286**, 30962–30971 (2011).
- 773 32. Rappsilber, J., Mann, M. & Ishihama, Y. Protocol for micro-purification, enrichment,  
774 pre-fractionation and storage of peptides for proteomics using StageTips. *Nat. Protoc.*  
775 **2**, 1896–1906 (2007).
- 776 33. Perez-Riverol, Y. *et al.* The PRIDE database and related tools and resources in 2019:  
777 Improving support for quantification data. *Nucleic Acids Res.* **47**, D442–D450 (2019).

778
